# Supplementary material for: Transcriptional Heterogeneity of Cryptococcus gattii VGII Compared with Non-VGII Lineages Underpins Key Pathogenicity Pathways
Source: PubMed Central journal article supplement (PMC6200987; doi:10.1128/msphere.00445-18), 2018-10-24

# Mouse and *C. gattii* RNA (% of sequenced reads)

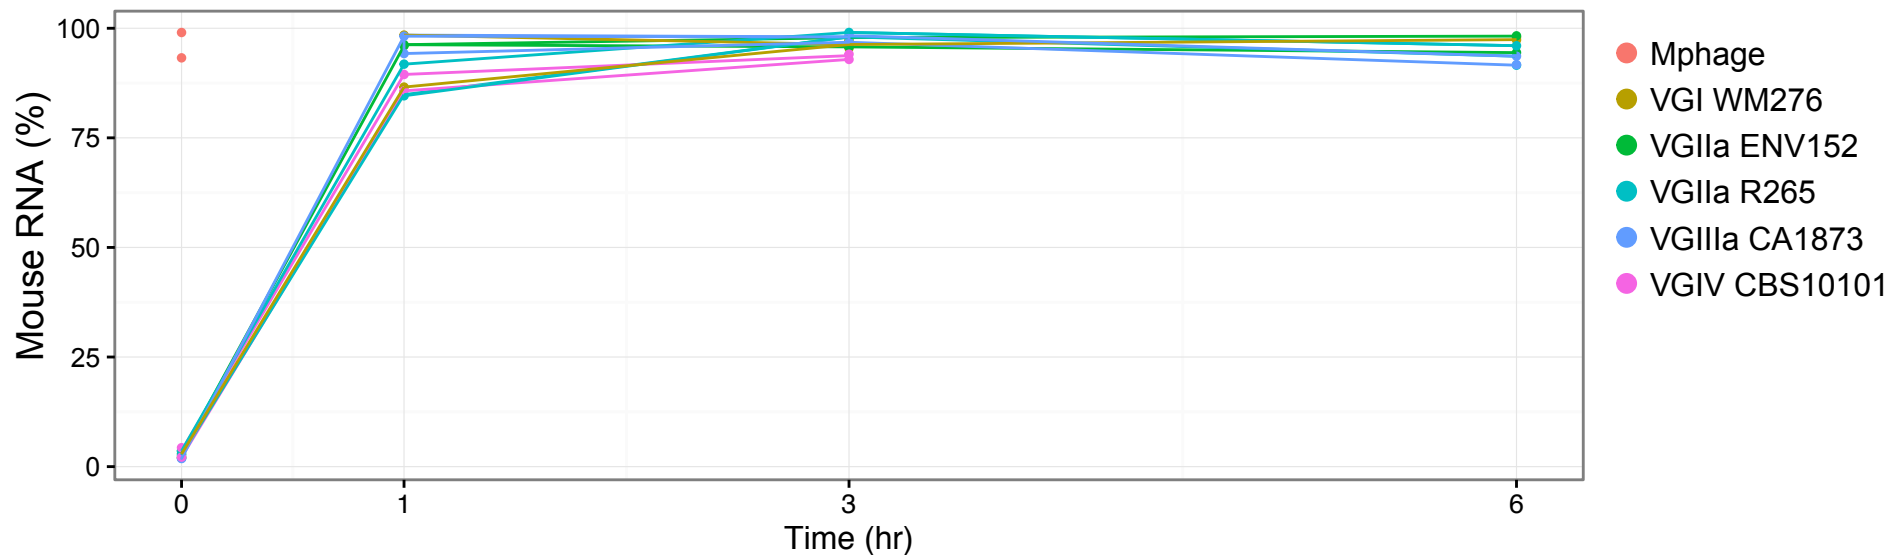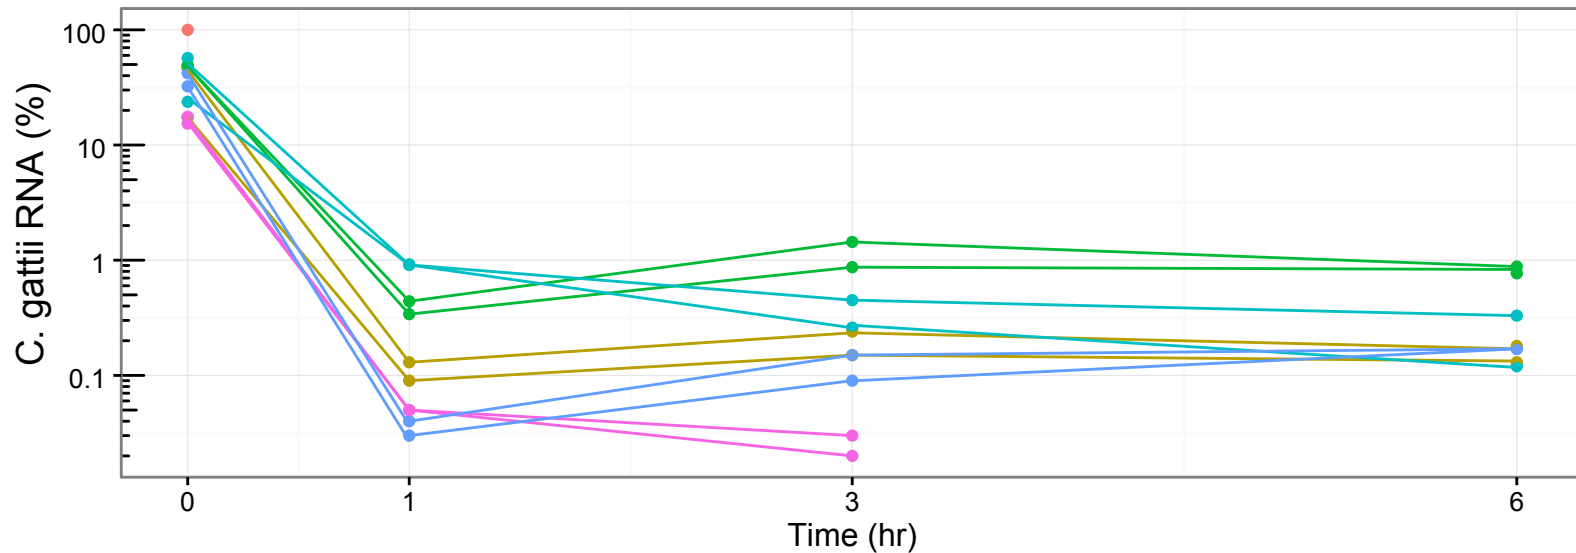

Supplement: sph006182675sf2.pdf [file sph006182675sf2.pdf]
