# Supplementary material for: Transcriptional Heterogeneity of Cryptococcus gattii VGII Compared with Non-VGII Lineages Underpins Key Pathogenicity Pathways
Source: PubMed Central journal article supplement (PMC6200987; doi:10.1128/msphere.00445-18), 2018-10-24

Log<sub>2</sub> TMM FPKM

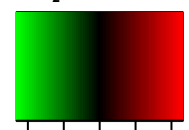

-10 -5 0 5 10

### VGI WM276

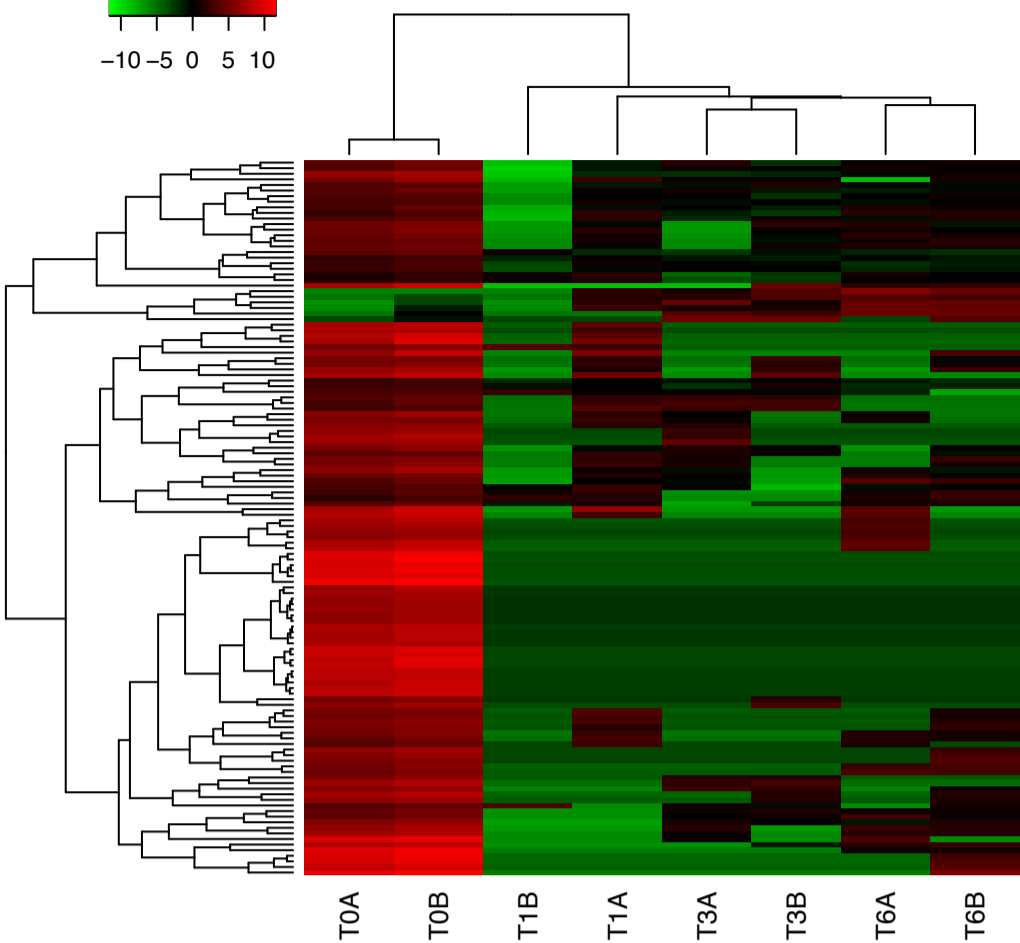

Log<sub>2</sub> TMM FPKM

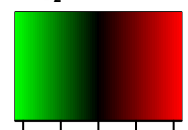

-10 -5 0 5 10

### VGIIa R265

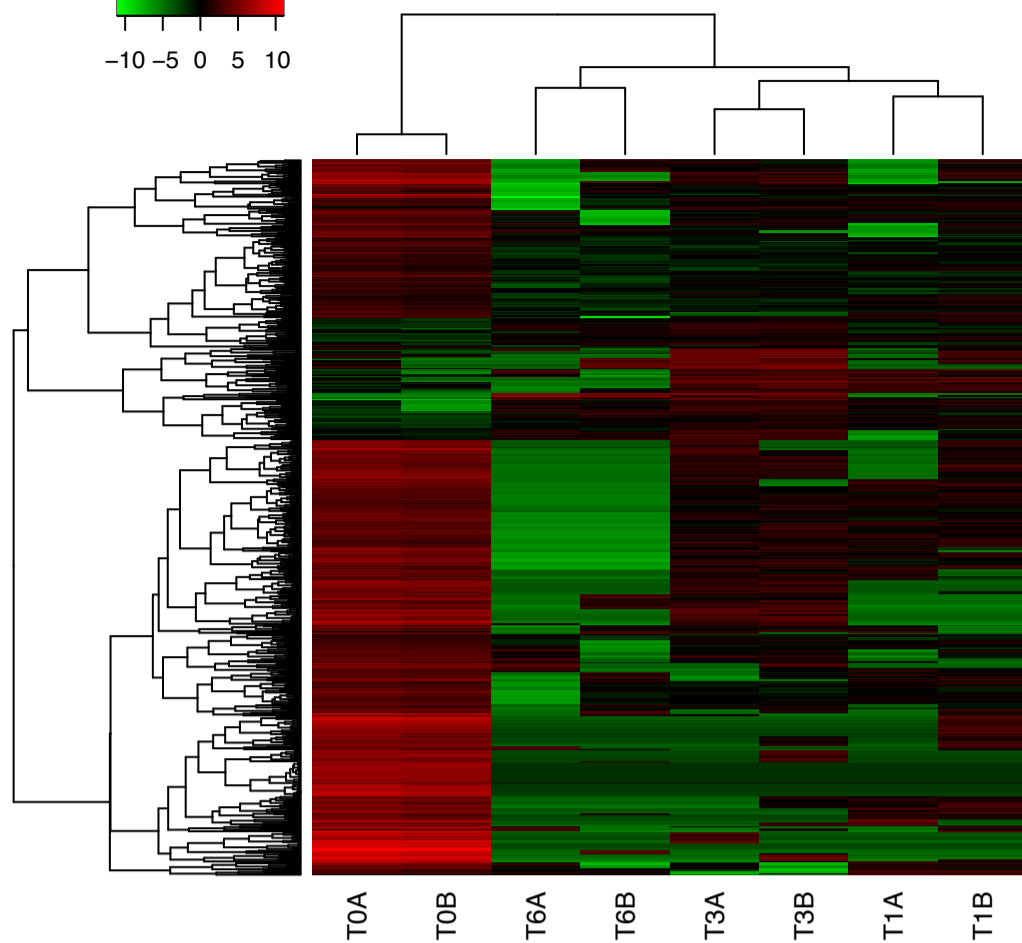

Log<sub>2</sub> TMM FPKM

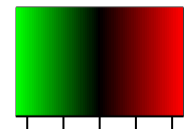

-10 -5 0 5 10

### VGIIa ENV152

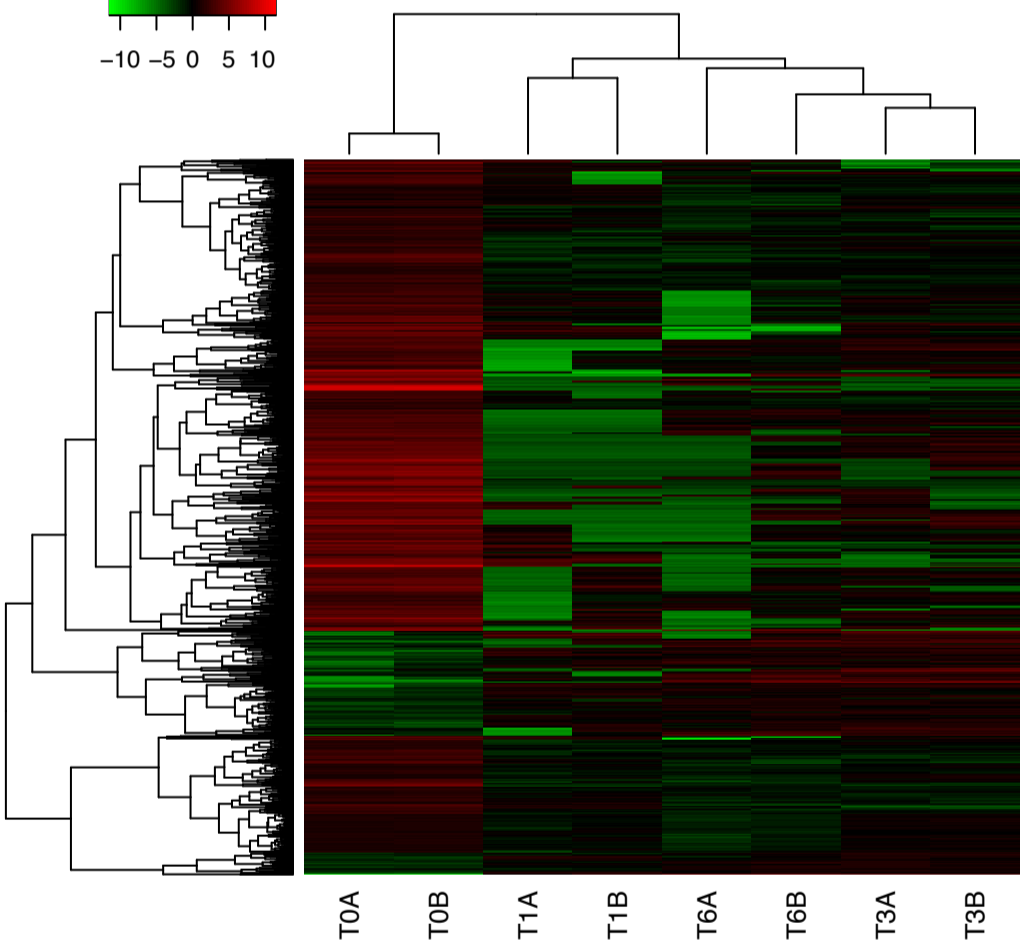

Log<sub>2</sub> TMM FPKM

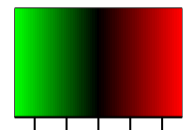

-10 -5 0 5 10

### VGIII CA1873

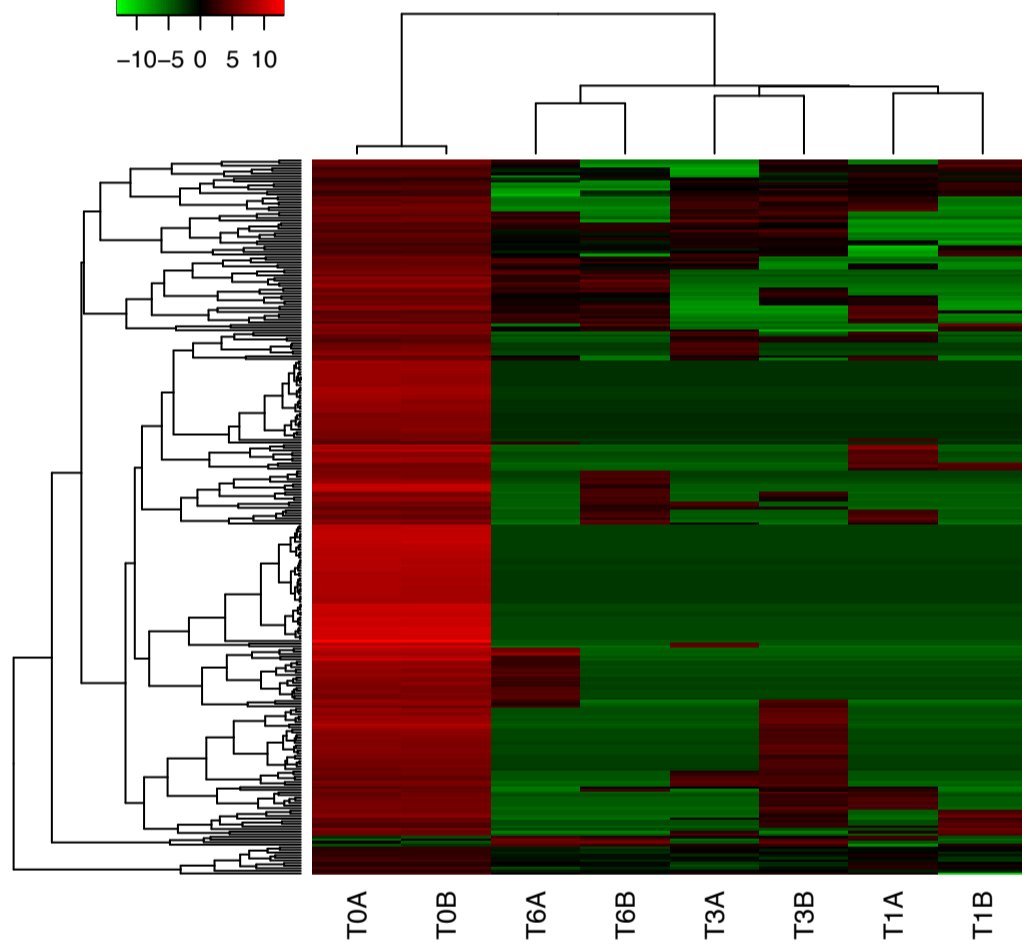

Log<sub>2</sub> TMM FPKM

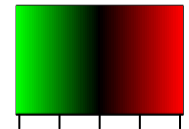

-10 -5 0 5 10

### VGIV CBS10101

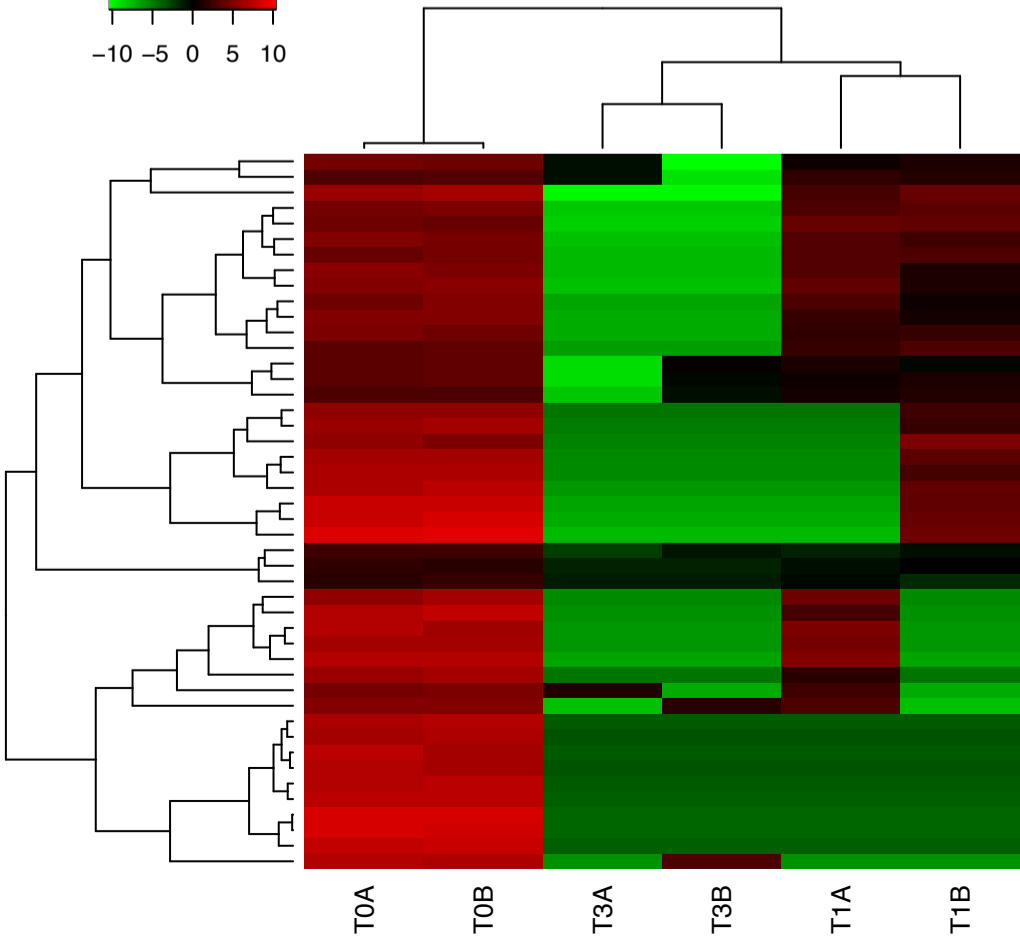

Supplement: sph006182675sf3.pdf [file sph006182675sf3.pdf]
