# Supplementary material for: Transcriptional Heterogeneity of Cryptococcus gattii VGII Compared with Non-VGII Lineages Underpins Key Pathogenicity Pathways
Source: PubMed Central journal article supplement (PMC6200987; doi:10.1128/msphere.00445-18), 2018-10-24

a) Differentially expressed *C. gattii* genes

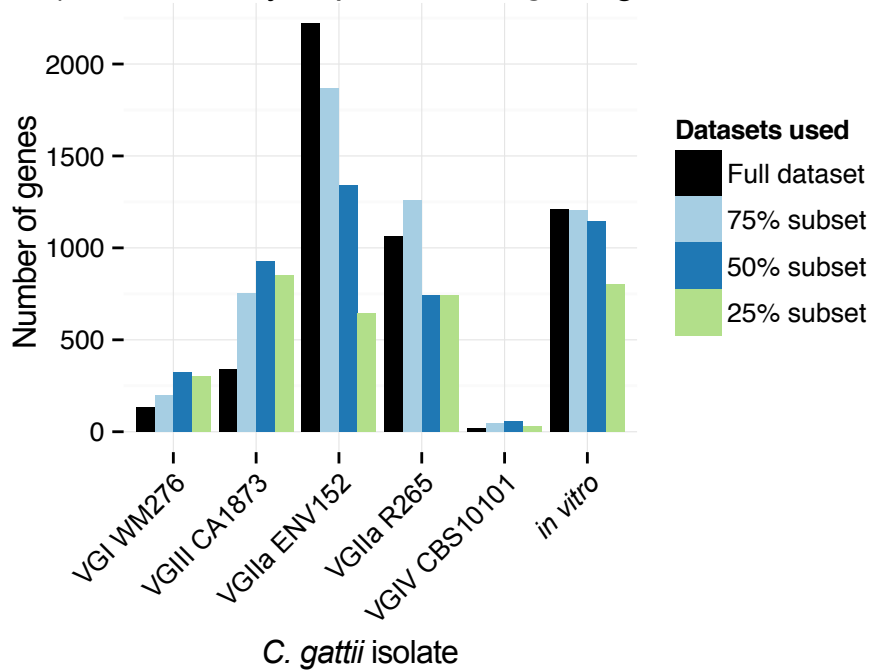

b) Genes found in Full dataset (%)

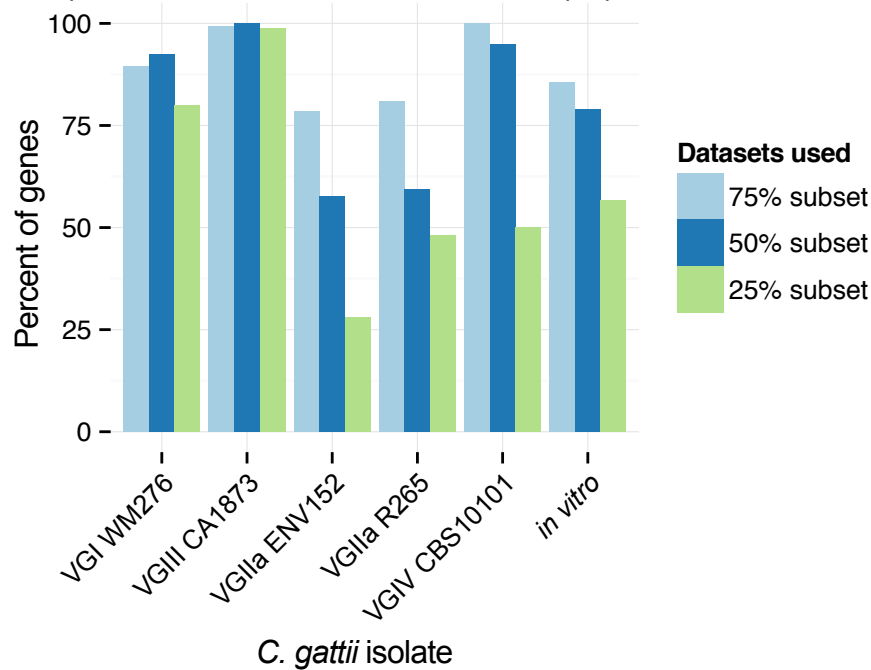

c) Genes found only in Full dataset

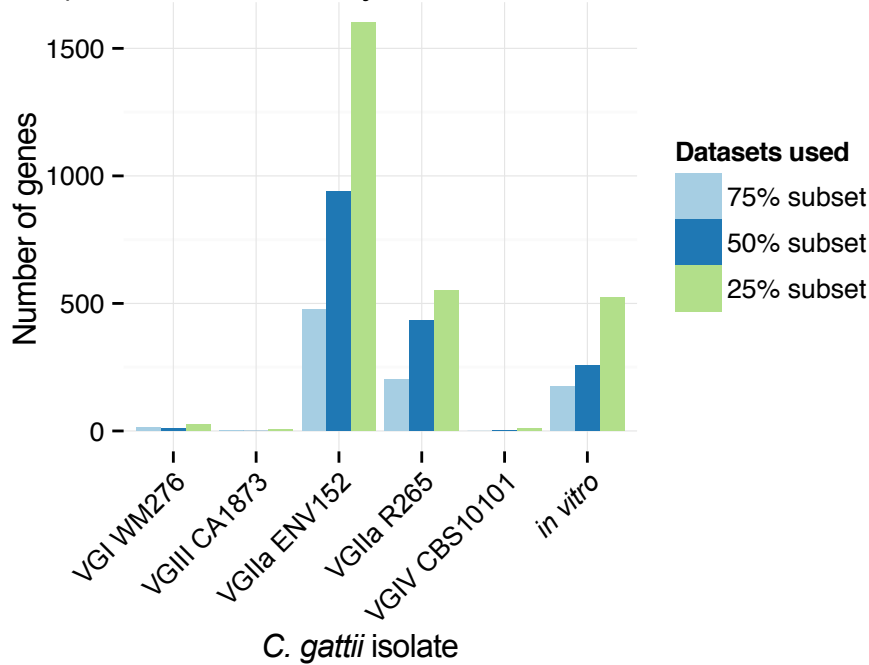

d) Genes not found in Full dataset

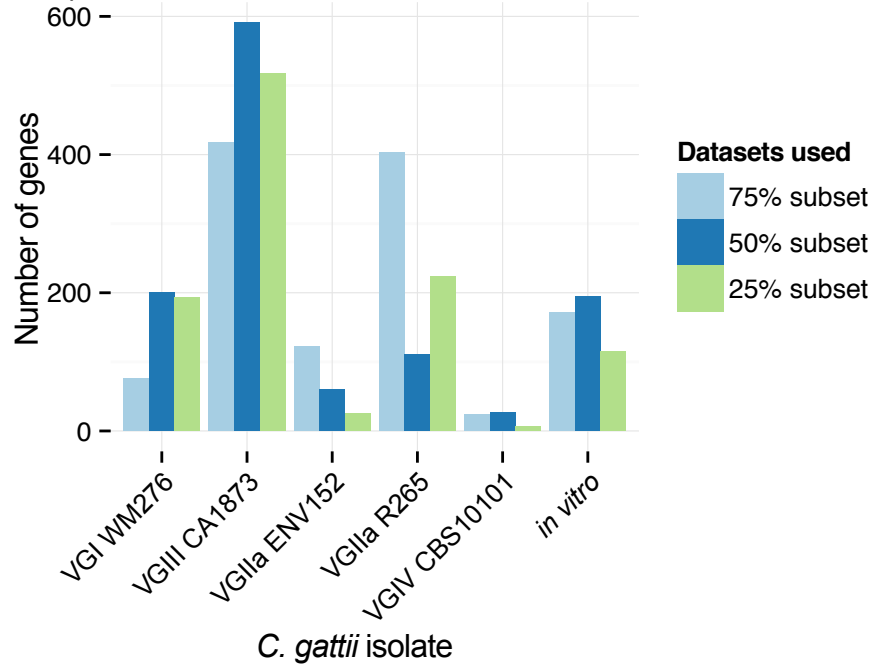

Supplement: sph006182675sf4.pdf [file sph006182675sf4.pdf]
